# Spatio-temporal point processes as meta-models for population dynamics in heterogeneous landscapes

Patrizia Zamberletti<sup>1</sup>, Julien Papaix<sup>1</sup>, Edith Gabriel<sup>1</sup>, and Thomas Opitz<sup>1</sup>

<sup>1</sup>*Biostatistics and Spatial Processes, INRAE, Avignon, France*

**Email** : patrizia.zamberletti@inrae.fr, julien.papaix@inrae.fr, edith.gabriel@inrae.fr, thomas.opitz@inrae.fr

**Corresponding author**: P. Zamberletti

## Abstract

Landscape heterogeneity affects population dynamics, which determine species persistence, diversity and interactions. These relationships can be accurately represented by advanced spatially-explicit models (SEMs) allowing for high levels of detail and precision. However, such approaches are characterised by high computational complexity, high amount of data and memory requirements, and spatio-temporal outputs may be difficult to analyse. A possibility to deal with this complexity is to aggregate outputs over time or space, but then interesting information may be masked and lost, such as local spatio-temporal relationships or patterns. An alternative solution is given by meta-models and meta-analysis, where simplified mathematical relationships are used to structure and summarise the complex transformations from inputs to outputs. Here, we propose an original approach to analyse SEM outputs. By developing a meta-modelling approach based on spatio-temporal point processes (STPPs), we characterise spatio-temporal population dynamics and landscape heterogeneity relationships in agricultural contexts. A landscape generator and a spatially-explicit population model simulate hierarchically the pest-predator dynamics of codling moth and ground beetles in apple orchards over heterogeneous agricultural landscapes. Spatio-temporally explicit outputs are simplified to marked point patterns of key events, such as local proliferation or introduction events. Then, we construct and estimate regression equations for multi-type STPPs composed of event occurrence intensity and magnitudes. Results provide local insights into spatio-temporal dynamics of pest-predator systems. We are able to differentiate the contributions of different driver categories (*i.e.*, spatio-temporal, spatial, population dynamics). We highlight changes in the effects on occurrence intensity and magnitude when considering drivers at global or local scale. This approach leads to novel findings in agroecology where the organisation of cultivated fields and semi-natural elements are known to play a crucial role for pest regulation. It aids to formulate guidelines for biological control strategies at global and local scale.

**Keywords:** spatio-temporal pattern, multi-type spatio-temporal point process, meta-model, spatially explicit model, system dynamics, landscape heterogeneity

## 1 Introduction

Community structure, population dynamics and species interactions within and between trophic levels are not limited within single plot's borders but depend on the spatial context (*e.g.*, patch size, spatial configuration, landscape composition, habitat connectivity; see Delaune et al. (2019)) and on ecological processes at different spatial scales (Pickett and Siriwardena, 2011). The key to understanding and predicting community structure and population distribution lies in the explication of the latent mechanisms and causes underlying observed patterns, which may emerge from the collective behaviour at smaller scale units or may be imposed by larger-scale constraints and the related temporal scale (Levin, 1992). Moreover, the influence of different spatial and temporal scales is closely related with species life-history traits, such as their ability to disperse, body size, competition, habitat specialisation, or trophic position (Rusch et al., 2010; O'Rourke et al., 2011). For example, foraging range and dispersal ability may determine the landscape elements that contribute to population dynamics and trophic interactions (Eber, 2001; Fahrig, 2001; Tschardtke and Brandl, 2004). Changes in spatial arrangement of habitats and composition could induce investment in the adaptation of dispersal-related traits (Tschardtke and Brandl, 2004).

Hence, dealing with ecological processes involves studying different spatial and temporal scales, since ecosystem patterns and processes cover various spatio-temporal ranges and may have multiple drivers acting across different extents (Fritsch et al., 2020). The characterisation of the spatial distribution of landscape features and individuals in response to such complex interplay of processes across scales belongs to the field of *landscape ecology*. To account for this complexity, the development of spatially explicit computer modelling and simulations are central for addressing theoretical questions. Many Spatially Explicit Model (SEM) types have been proposed, such as continuous-space reaction-diffusion partial differential equations (Roques, 2013), patch models (Hanski and Thomas, 1994), cellular automata neighborhood models (Hogeweg, 1988), or individual-based models (IBM, Grimm et al., 2005). DeAngelis and Yurek (2017) show the importance and the benefits of using SEMs compared to Spatially Implicit Models (SIMs) through different examples, including a savanna ecosystem. They find that the details and small-scale processes captured by SEMs are fundamental drivers for the ecosystem and its dynamics. SEMs can simulate the emergence of both small- and large-scale patterns from these processes and reveal deep details of dynamics such as predator-prey interactions and food web chains.

The development of advanced numerical models has greatly improved our ability to accurately describe complex dynamics incorporating fine-grain interactions over a large extent. However, as models aim to provide a realistic but simplified representation of reality, the spatio-temporal extent is often properly adapted by scaling decisions (Fritsch et al., 2020). In-model scaling methods give control over simplifications when

36 building the model or allow us to incorporate and transfer relevant information across different scales.  
37 Scaling techniques may also be used before or after building the model, to define model parameters or  
38 analyse model outputs. In this work we focus on post-model scaling and propose a parsimonious approach  
39 to deal with the complexity of SEM outputs while keeping fine-scale information on the ecological dynamics.  
40 A solution to deal with this complexity could be the application of non-spatial analysis methods via spatial  
41 and temporal output aggregation (Gotelli, 2000; Webb, 2000; Fritsch et al., 2020). For example, Nathan et al.  
42 (2019) use spatially-explicit IBMs to study the hybridisation dynamics among species by describing their  
43 relationships across ecological scales, and then model outputs are integrated over space and time. In this case,  
44 however, all fine-scale information is lost, thus impeding any analysis of the drivers acting across different  
45 scales. An alternative solution is represented by meta-models and meta-analysis, which offer the possibility  
46 of reducing model output complexity by establishing a simplified mathematical relationship between the  
47 input and output of the system (Simpson et al., 2001). Their main aim is to replace complex numerical  
48 models by more parsimonious representations that provide a better understanding and faster analysis tools  
49 for optimisation and exploration, specifically when performing uncertainty or sensibility analysis (Simpson  
50 et al., 2001; Jia and Taflanidis, 2013; Saint-Geours, 2012; Ratto et al., 2012). Where possible, an elegant way  
51 to build meta-models is the approximation through an analytical model, which is fitted to the large-scale  
52 output and allows for simplification (Grimm and Railsback, 2005). Analytical solutions can provide insight  
53 from different aggregation levels, but their construction and use are not always unequivocal (see Johst et al.,  
54 2013). Spatial statistic techniques are potential candidates of great interest and should be further explored  
55 (Fritsch et al., 2020). For example, Jia and Taflanidis (2013) present a systematic implementation and  
56 optimisation of kriging meta-models for hurricane wave and surge prediction maps based on high-dimensional  
57 outputs to reduce complexity while preserving spatial dimension. In functional Magnetic Resonance Imaging  
58 analysis, Kang et al. (2014) show a meta-analysis approach to synthesise brain mapping information from  
59 images. Given brain activation maps, they propose a spatial point process approach to model peak activation  
60 locations, which were identified as local maxima of brain activation area, explaining the brain task involved.

61 Here, we show how spatio-temporally explicit outputs of population dynamics models in landscape ecology  
62 can be analysed through a meta-modelling approach. Such outputs are simplified to point patterns composed  
63 of individual positions, key events or significant hotspots defining local dynamics. The resulting patterns  
64 can be modelled as spatio-temporal point processes (STPP), and the pattern itself, or rather its structure,  
65 is the response variable that one seeks to explain through the structure of the spatial support, and its  
66 temporal changes, described through appropriately defined predictor variables (Diggle, 2003; Illian et al.,  
67 2012; Renshaw, 2015; Illian and Burslem, 2017). Point processes can be defined over continuous space  
68 and time, such that there is no need to work with fixed spatial and temporal units; they can be used for

69 descriptive analyses and stochastic modelling of patterns. For example, Law et al. (2009) apply STPP tools  
70 by computing first- and second-order statistics, *i.e.*, expected numbers of points, and of point pairs with  
71 given point-to-point distance, for characterising observed plant patterns; Gabriel et al. (2017); Opitz et al.  
72 (2020); Pimont et al. (2020) develop models for wildfire occurrences through STPPs to overcome challenges  
73 given by the multi-scale structure of data and by strong non-stationarities in space and time driven by  
74 weather, land-cover and land-use.

75 The main novelty of our work resides in the characterisation of spatio-temporal population dynamics  
76 through STPPs. As a case study application, we focus on the relationships among agricultural landscape  
77 structure and the dynamics of a pest and its natural enemy. A hierarchical framework is developed (Figure 1):  
78 (i) a stochastic landscape model, characterised by parameters determining the landscape configuration and  
79 composition, is constructed and simulated; (ii) a spatially explicit population dynamics model, characterised  
80 by parameters determining the pest-predator structure and its spatial heterogeneity, is constructed and  
81 simulated. We propose to represent spatio-temporally explicit outputs returned by this modelling chain as  
82 point patterns identifying space-time-indexed key events of pest dynamics, that we subsequently model by  
83 constructing and estimating statistical regression equations for multi-type STPPs. The response variables  
84 we aim to model are the occurrences and the magnitude of the pest density peaks. Response variables  
85 are explained by taking into account both global and local landscape features, species life-history traits,  
86 and the occurrences of pest inoculation, pest peaks and treatments in appropriately chosen spatio-temporal  
87 neighborhoods around the location and time where the response variable was observed. This approach  
88 allows us to investigate the role of landscape structure in influencing the point process intensity summarising  
89 the pest-predator dynamics, and we address two general questions: (1) How can landscape effects and  
90 population dynamics traits at different spatio-temporal scales be coupled? (2) What are the spatio-temporal  
91 relationships between pest inoculations, pest density peaks and landscape heterogeneity?

## 92 **2 Simulation models for landscape-pest-predator dynamics**

### 93 **2.1 Pest-predator models within agricultural landscapes**

94 We model agricultural landscapes composed by crops, semi-natural areas and hedges through a stochastic  
95 landscape generator. Landscape simulations are the spatial support for a spatially explicit population model  
96 of auxiliaries and pests with opportune chemical treatments on pests. To couple the landscape complex and  
97 the spatially explicit population model, we allow for dispersal both on agricultural fields and on hedge network  
98 (Figure 1). The agricultural landscape is composed of patches (*i.e.*, polygons) and linear elements (*i.e.*,

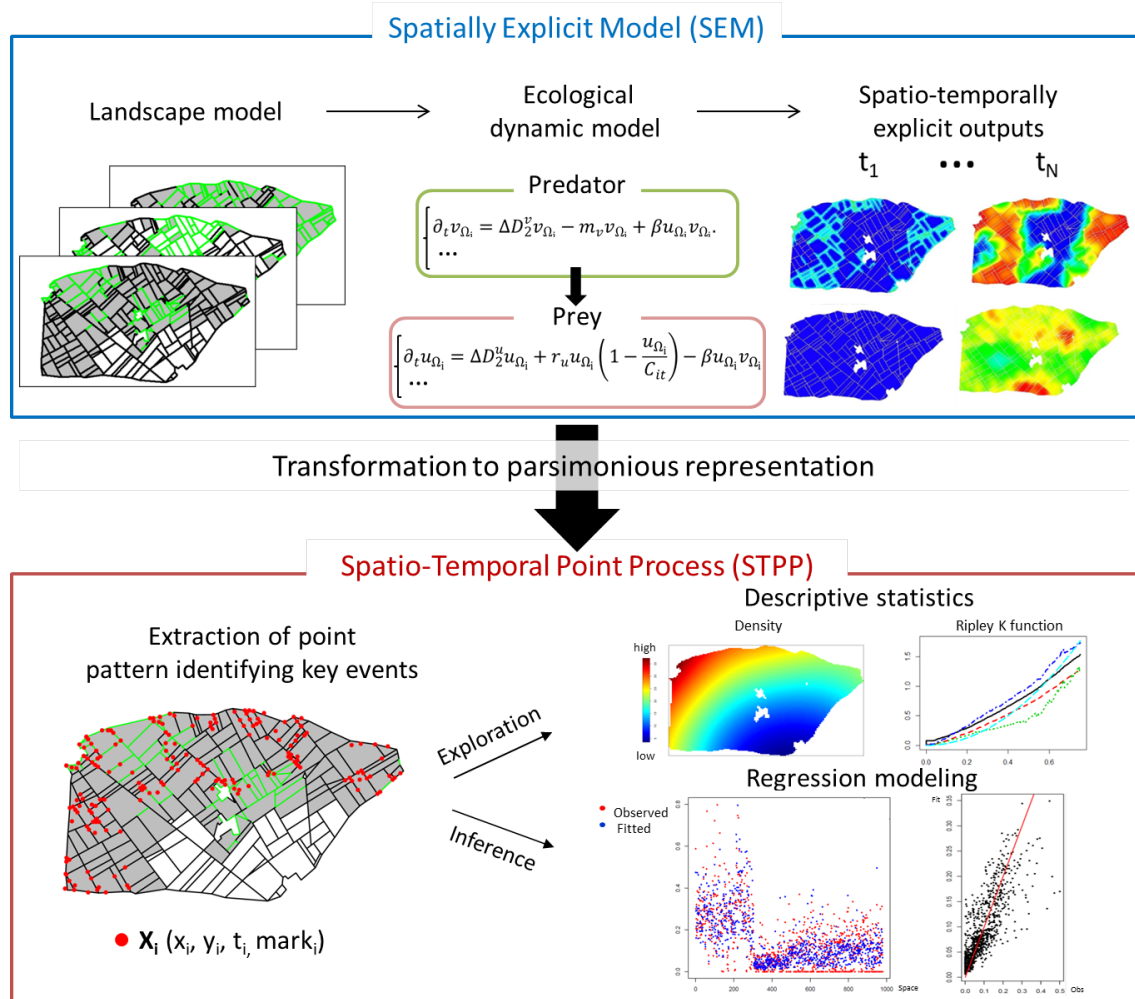

Figure 1: Overview of meta-modeling workflow.

99 segments) (Zamberletti et al., 2021). We generate a wide variety of structurally different composition and  
 100 configuration scenarios for the allocation of crop over patches and of hedges over linear elements by varying  
 101 representative parameters (*i.e.*, crop and hedge proportion and their aggregation); details are provided in  
 102 the Supplement. Within these generated spatial supports, we then simulate the dynamic of the codling  
 103 moth (*Cydia pomonella*) pest and of one of its main predators, the family of ground beetles (*Carabidae*),  
 104 in apple orchards. The pest-predator model is defined by a spatially explicit and density-based model of  
 105 reaction-diffusion type (Roques and Bonnefon, 2016).

106 Codling moths respond strongly to the spatial distribution of orchards over landscapes (Tischendorf,  
 107 2001; Ricci et al., 2009). Franck et al. (2011) have found low genetic differentiation among codling moth  
 108 populations over large distances, but mild genetic differentiation among populations collected on different  
 109 host plants. In addition, insecticide treatments have strong effects on genetic differentiation resulting from

110 spatial and temporal population size variations (Franck et al., 2011). This indicates that codling moths  
111 can disperse over large distances in agricultural landscapes, which supports the conjecture that hedges do  
112 not substantially impact their dispersal, such that insecticide treatments to break the pest dynamics are  
113 important. Thus, in the model, we assume that the pest can be encountered only in fields and that it  
114 has positive growth only in fields allocated with crop. In addition, field boundaries do not affect the pest  
115 population dynamics; *i.e.*, the life cycle of *Cydia pomonella* is mostly based in apple orchards, and it perceives  
116 the landscape as a heterogeneous 2D environment. Finally, we impose the application of local insecticide  
117 treatments when the pest density exceeds a fixed threshold on average in a crop patch.

118 The presence of semi-natural areas, such as hedges, promotes the presence of pest auxiliaries (Maalouly  
119 et al., 2013; Thies and Tschardtke, 1999) by offering shelter and by providing complementary resources when  
120 pests are not present in fields (Lefebvre et al., 2017). Lefebvre et al. (2017) present a field study investigating  
121 the routine movement of arthropods among apple orchards and adjacent hedgerows. They found that there  
122 are frequent movements for foraging (to orchards) and for escaping treatments (to hedges), demonstrating  
123 the important influence of hedgerows on the presence of numerous predators in apple orchards. Thus, we  
124 consider that hedges form the main habitat of the predator. The predator can spill over from hedges to fields  
125 and there feed on pest in fields as an alternative resource. However, it is generally attracted to hedges, which  
126 are its preferred habitat, so that migration from fields to hedges is relatively high. The predator is known  
127 to be averse to moving outside its natural habitat; therefore, migration from hedges to fields is always lower  
128 than migration from fields to hedges (Lefebvre et al., 2017).

129 Details about the pest-predator dynamics among 1D and 2D elements are fully presented in Roques  
130 and Bonnefon (2016). All the parameters are shown in the Supplement. To fix parameter ranges, we had  
131 performed a sensitivity analysis in a preliminary step since observation data of pests and predators are not  
132 available (Zamberletti et al., 2021). Initially, the predator is present in all hedges at carrying capacity. The  
133 pest is introduced randomly in space and time. The time unit can be considered as the day. Overall,  
134 172,500 simulations were run by varying landscape and population parameter configurations (see parameter  
135 ranges in Table 1 of the Supplement), with 15 simulations for each configuration where parameters are fixed  
136 but landscape realisations are stochastic.

## 137 **2.2 Pest-predator spatio-temporal patterns**

138 Simulations provide the spatio-temporal pest and predator densities. We characterise the influence of land-  
139 scape spatio-temporal structure on the prey-predator dynamics by using point patterns. Following our  
140 modelling framework, we identify as events (i) the spatio-temporal treatment occurrence (*i.e.*, pest threshold

141 exceedance or pest peak) and (ii) the spatio-temporal pest introductions. For example, when pest thresh-  
142 old exceedance occurs in a patch, we apply a treatment in this patch and, to define the event episode as  
143 a point, we extract the time  $t$  of threshold exceedance, the pest density maximum in the patch with its  
144 Euclidean coordinates  $(x, y)$ , and the average pest density over the patch. In Figure 2, two simulations are  
145 shown for different time steps, where the spatio-temporal occurrences of pest inoculations and treatments  
146 within different landscape allocations are highlighted. This example also illustrates the conjecture that the  
147 spatial hedge structure plays a role for pest dynamic by influencing its evolution jointly in space and time.  
148 Deeper exploratory quantitative analyses of spatio-temporal relationships between different types of points  
149 are proposed in the Supporting information, while we focus on statistical model-based analyses in what  
150 follows.

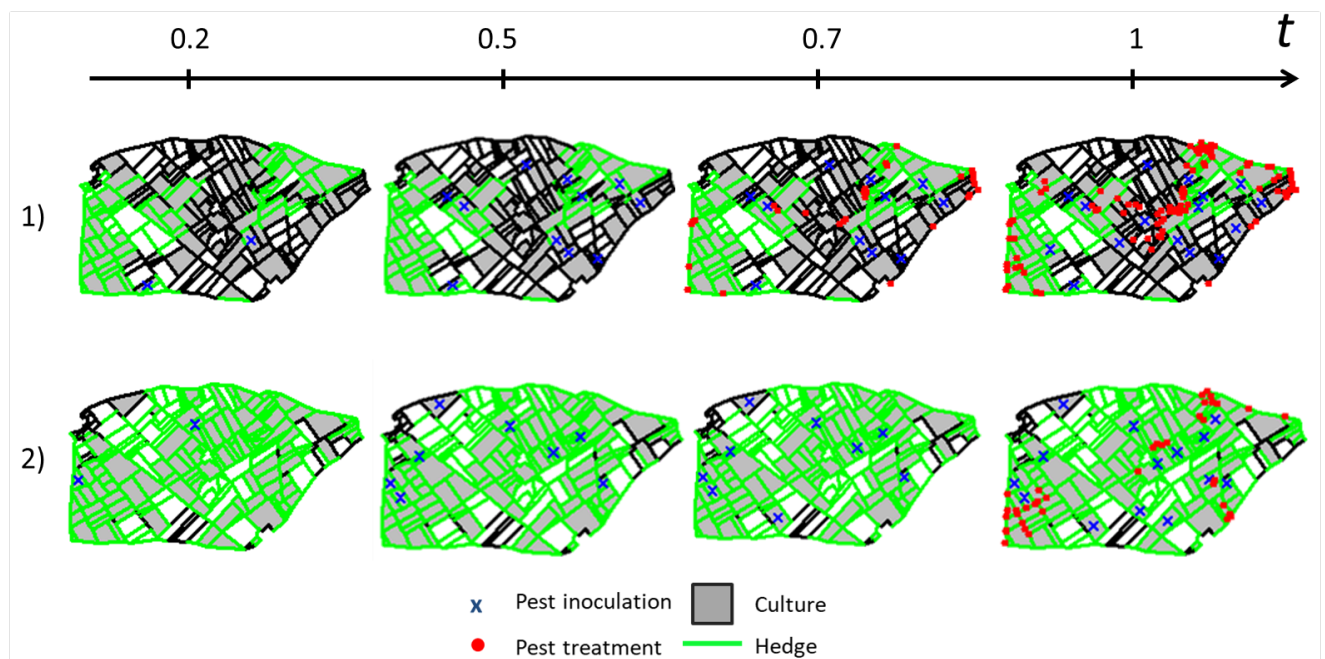

Figure 2: Two simulation examples (by row) illustrating the spatio-temporal pest dynamics depending on landscape structure through pest inoculations, and through pest density peaks after threshold exceedances.

### 151 3 Methods: STPP-based analysis of pest-predator dynamics

#### 152 3.1 Pest density as STPP

153 Point patterns representing individual or event distributions in space and time can be modelled as STPPs (see  
154 Diggle (2003); Illian et al. (2008); Baddeley et al. (2015) for formal definitions). Each point can be endowed  
155 with additional qualitative or quantitative information defined as a “point mark”. In our application, the



156 pattern of events is defined by the coordinates in space and time of pest peaks with both qualitative (pest  
157 inoculation) and quantitative marks (pest maximum density). Thanks to the theory of STPPs it is possible  
158 to analyse the point distribution properties locally in space and time, and to estimate models for predictive  
159 purposes (*e.g.*, number of events, point-to-point correlations, and distribution of their numerical or categorical  
160 marks). We focus on modelling the point process intensity function (local point density) (Illian et al., 2013).  
161 Our modelling goal is to predict the intensity of pest density peaks and the associated values of maximum  
162 pest density, and explain their variability in space, through time and across different simulations. We divided  
163 the spatial domain in a relatively large number of small cells, and we assume a homogeneous point process  
164 intensity within each cell during each interval of time. The spatial discretisation we use is shown in Figure  
165 3, and background on its structure and construction is provided in the Supplement.

166

### 167 3.2 Pest density peak meta-modelling

For predicting the intensity of pest density peaks and associated values of maximum pest density, we develop and estimate regression equations for multi-type STPPs. Both global and local landscape features, species life-history traits, and the occurrences of pest introductions, pest peaks and treatments are used as covariate information. We construct two separate generalized linear model (GLM) formulas as meta-models that incorporate the available covariate information. Response variables and covariates are evaluated over each spatial cell (Figure 3) and time step. The spatio-temporal (*STC*), spatial (*SC*) and population dynamics (*PDC*) covariates put the spatio-temporal event patterns, landscape structure and population dynamics into relation:

$$STC(s, t) = \sum_{k=1}^{12} \beta_k z_k(s, t), \quad SC(s) = \sum_{k=13}^{20} \beta_k z_k(s), \quad PDC = \sum_{k=21}^{23} \beta_k z_k, \quad \beta \in \mathbb{R}^{23}, \quad (1)$$

168 The  $\beta$  vector gathers the covariate coefficients to be estimated separately for each model, and the values  
169  $z_k$  are covariates summarised in Table 1 and provided for each space-time cell. More information on their  
170 selection and computation is given in the Supporting information, as well as residual analysis to evaluate  
171 the predicted values obtained by the GLMs.

Table 1: Covariates used in the space-time regression model of pest density peak patterns. The temporal unit  $d$  stands for *day*.

| Index                                   | Covariate                                                           | Spatial reference | Range   | Unit         |
|-----------------------------------------|---------------------------------------------------------------------|-------------------|---------|--------------|
| <b>Spatio-temporal (<i>STC</i>)</b>     |                                                                     |                   |         |              |
| 1                                       | No. of treatments in the patch at $t - 1$                           | patch             | 0-40    | -            |
| 2                                       | No. of treatments in the patch cumulated up to $t - 2$              | patch             | 0-97    | -            |
| 3                                       | No. of treatments in neighbor patches at $t - 1$                    | patch             | 0-337   | -            |
| 4                                       | No. of treatments in neighbor patches cumulated up to $t - 2$       | patch             | 0-861   | -            |
| 5                                       | No. of pest density peaks at $t - 1$                                | cell              | 0-15    | -            |
| 6                                       | No. of pest density peaks cumulated up to $t - 2$                   | cell              | 0-36    | -            |
| 7                                       | No. of pest density peaks in neighbor cells at $t - 1$              | cell              | 0-45    | -            |
| 8                                       | No. of pest density peaks in neighbor cells cumulated up to $t - 2$ | cell              | 0-97    | -            |
| 9                                       | No. of pest introduction in cell at $t - 1$                         | cell              | 0-30    | -            |
| 10                                      | No. of pest introduction in cell cumulated up to $t - 2$            | cell              | 0-30    | -            |
| 11                                      | No. of pest introduction in neighbor cells at $t - 1$               | cell              | 0-30    | -            |
| 12                                      | No. of pest introduction in neighbor cells cumulated up to $t - 2$  | cell              | 0-39    | -            |
| <b>Spatial (<i>SC</i>)</b>              |                                                                     |                   |         |              |
| 13                                      | Cell dimension                                                      | cell              | 0-0.069 | $km^2$       |
| 14                                      | Binary indicator if the cell is among 2 patches                     | cell              | 0-1     | -            |
| 15                                      | Binary indicator (1/0) if the cell is among 3 or more patches       | cell              | 0-1     | -            |
| 16                                      | Proportion of hedges within the buffer centered in the cell         | buffer            | 0-1     | %            |
| 17                                      | Proportion of crops within the buffer centered in the cell          | buffer            | 0-1     | %            |
| 18                                      | Landscape crop and hedge aggregation                                | landscape         | 0-5.54  | -            |
| 19                                      | Landscape crop proportion                                           | landscape         | 0-1     | %            |
| 20                                      | Landscape hedge proportion                                          | landscape         | 0-1     | %            |
| <b>Population dynamics (<i>PDC</i>)</b> |                                                                     |                   |         |              |
| 21                                      | Pest diffusion in crop patch                                        | landscape         | 0.06-12 | $km^2d^{-1}$ |
| 22                                      | Predator diffusion in crop patch                                    | landscape         | 0.07-12 | $km^2d^{-1}$ |
| 23                                      | Predator migration from hedge to crop                               | landscape         | 0.1-1   |              |

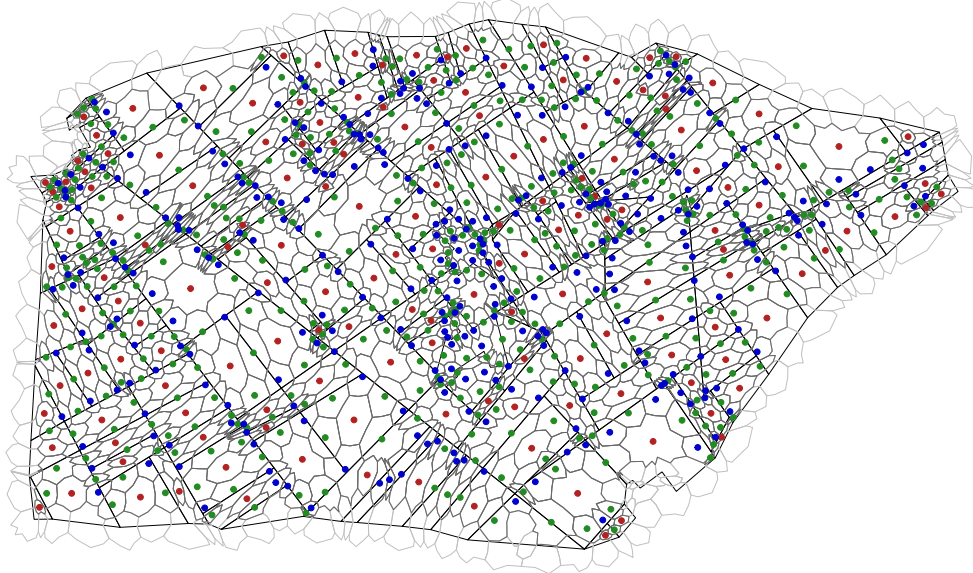

Figure 3: Spatial discretisation of the regression models. Complete mesh discretisation (light grey), mesh cells used in the analysis (dark grey), landscape patches (black). Cell centroids of different colour refer to different cell types: cell in patch center (red), cell connecting exactly two patches (green), cell connecting more than two patches (blue).

### 172 3.2.1 Meta-model for the occurrence intensity of pest density peaks

173 To model the occurrence intensity of pest density of pest peak points, we consider a GLM with Poisson  
174 response, *i.e.*, we combine a log-link function with a Poisson response distribution:

$$\lambda(s, t) = \exp(\beta_0^\lambda + STC(s, t) + SC(s) + PDC) \quad (2)$$

175 with global intercept  $\beta_0^\lambda$  and coefficients of the other variables to be estimated. The value  $\lambda(s, t)$  represents  
176 the average number of pest peaks occurring in a unit of space and time around the point  $(s, t)$ , and is assumed  
177 to be constant within each cell of the mesh during each time interval of 0.1.

178

### 179 3.2.2 Meta-model for magnitudes of pest density peaks

180 To model the maximum pest density value associated with each pest peak point, we consider a log-Gaussian  
181 GLM, *i.e.*, we combine a log-link function with a Gaussian response distribution:

$$P_{max}(s, t) = \exp\left(\beta_0^{P_{max}} + STC(s, t) + SC(s) + PDC + \varepsilon(s, t)\right) \quad (3)$$

182 with global intercept  $\beta_0^{P_{max}}$  and coefficients of the other variables to be estimated, where  $P_{max}(s, t)$  is the  
183 maximum pest density value associated to the point where the treatment is applied conditional to the occur-  
184 rence of such a point. The term  $\varepsilon(s, t) \sim \mathcal{N}(0, \sigma^2)$  corresponds to the spatially and temporally independent  
185 and identically distributed Gaussian error terms.

186

## 187 4 Results: spatiotemporal drivers of pest hotspots in pest-predator 188 agroecological system

189 We present main results obtained by estimating the GLMs in Equations 2 and 3. Additional results of a  
190 covariate correlation analysis and of residual analysis are reported in the Supporting information; they show  
191 that the models defined in Equations 2 and 3 appropriately capture the spatio-temporal variability of the  
192 observed data (*i.e.*, population dynamic model outputs).

193

194 The estimated GLM coefficients for the models in Equations 2 and 3 are summarized in Figure 4. Prior  
195 to estimation, covariates have been normalised to empirical mean 0 and variance 1 to compare more easily  
196 the magnitudes of estimated effects.

197 We first discuss the strongest effects corresponding to points outside the inner rectangle in Figure 4a.  
198 The strongest positive effects on the number of pest peaks arise for covariates favouring pest dynamics.  
199 Specifically, crop coverage at local scale (*i.e.*, in the buffer) and at global scale (*i.e.*, in the whole landscape)  
200 favours the abundance of suitable habitat for pests, which can easily spread and find resources. Regarding  
201 the pest peak value, the cell size has the strongest positive contribution. An explanation is that the pest  
202 density is likely to be highest where the inoculation takes place, and a large cell is more often inoculated  
203 than a smaller cell. By contrast, cell dimension contributes the strongest negative effect on the number  
204 of peaks, since peaks tend to concentrate in the periphery of the patches, thus in cells containing borders  
205 among different patches.

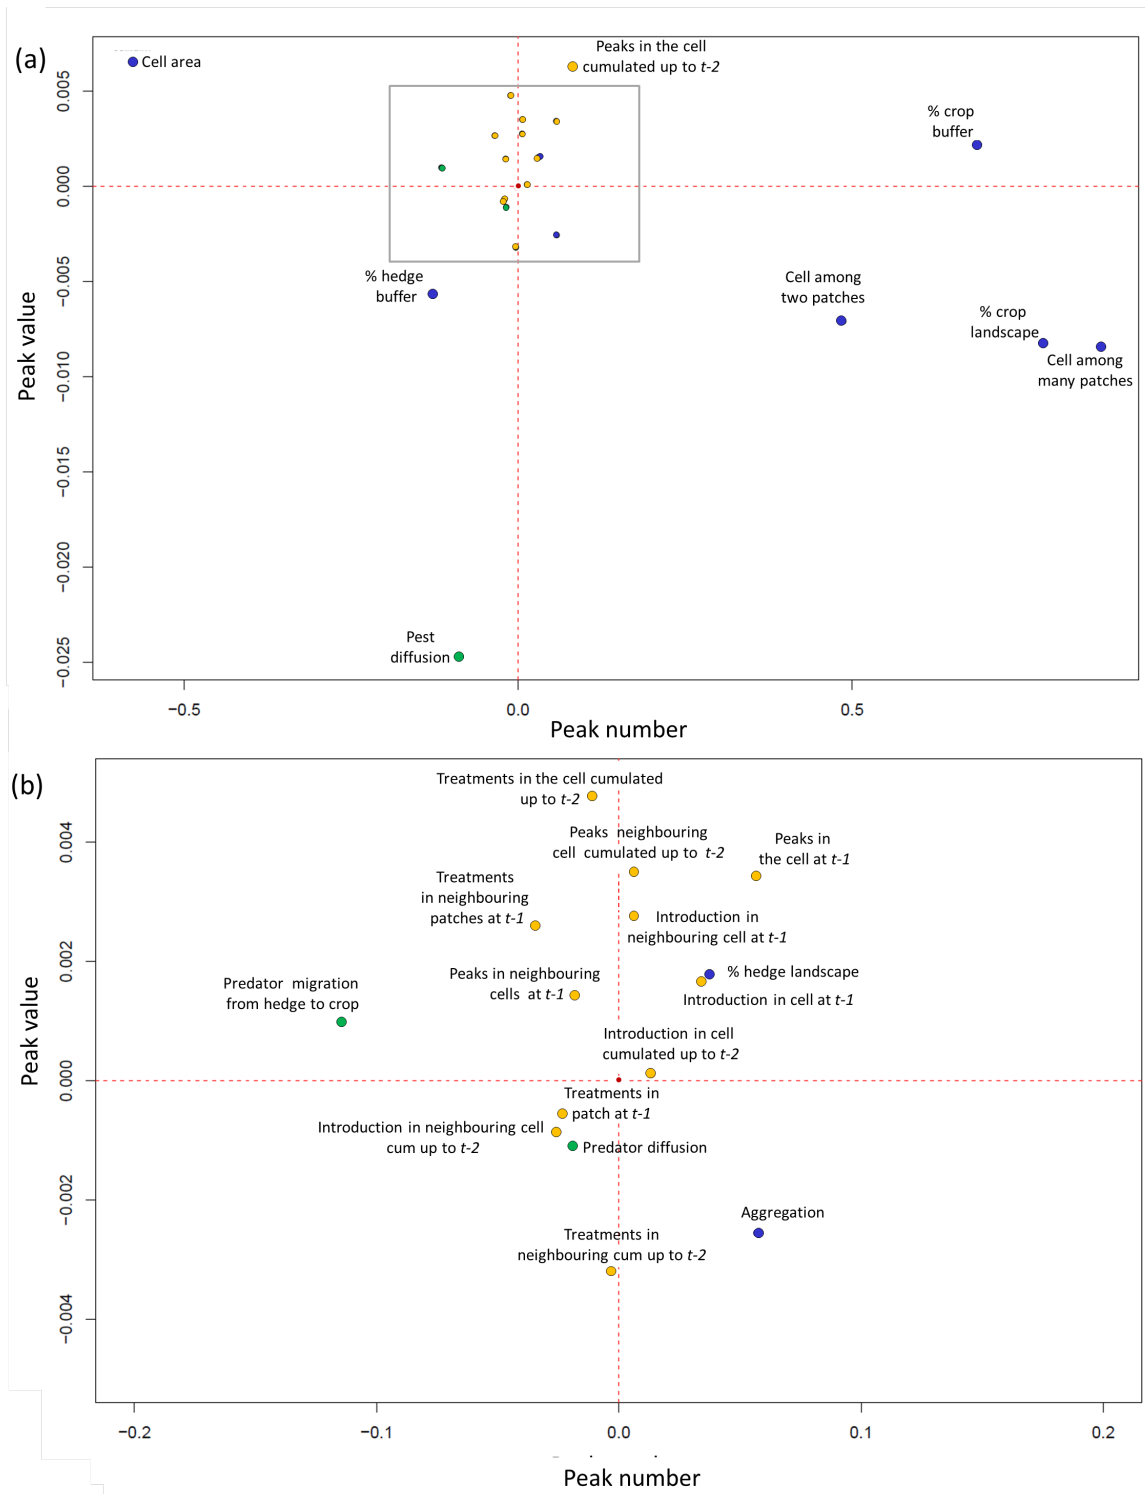

Figure 4: Estimated regression coefficients for the models of peak occurrence intensity ( $x$ -axis) and the model of the peak value ( $y$ -axis). Dot colours indicate covariate types: *STC* (orange), *SC* (blue), *PDC* (green).

206 Pest diffusion has the strongest negative effect on pest peak values, it may be due to a dilution effect.  
207 In addition, since high pest diffusion allows the pest to easily move, pest population tends to spread homo-  
208 geneously over the whole landscape. Therefore, few local hotspots arise, and the pesticide threshold is less  
209 often exceeded. Both response variables related to pest peaks are also strongly reduced by local predator  
210 presence, which in turn is mainly driven by a high local presence of hedges. The spatio-temporal covariate  
211 group (STC) shows generally weaker effects on pest dynamics, except for the local cumulated number of pest  
212 peaks during earlier time intervals. It positively influences the number and the value of pest peaks since  
213 pests are already present at high density in the surrounding area if there have been peaks during earlier  
214 intervals. Such locations may have characteristics that make them particularly pest-prone and favourable  
215 for pest dynamics.

216 The zoom in Figure 4b shows covariate effects with a lower magnitude. High numbers of pest peaks along  
217 with high peak concentration values (top-right quadrant in Figure 4) are relatively strongly favoured by the  
218 presence of previous peaks in the same cell or in the surrounding ones (both at  $t - 1$ , and cumulated up to  
219  $t - 2$ ). Similarly, an elevated number of introductions in neighbouring cells leads to high pest concentration  
220 due to pest spillover. On the other hand, the application of treatments locally in the patch or in neighbouring  
221 patches at previous time steps leads in general to a decrease of both the number and the concentration value  
222 of peaks.

223 Results show a negative effect of hedge proportion in the buffer on pest activity. However, there also arises  
224 a weaker but positive effect of the hedge proportion over the whole landscape, which may appear counter-  
225 intuitive at first glance. Since response variables are evaluated at cell scale, having a large hedge proportion  
226 in the whole landscape but a low proportion of hedges in the buffer clearly results in a concentration of  
227 pest where hedges are missing. In addition, hedges help to keep the pest below the treatment threshold  
228 and therefore favour its propagation through the landscape (see Zamberletti et al. (2021)); therefore, the  
229 pest may reach areas of lower predation pressure more easily and pull out. In addition, our model shows  
230 that the landscape aggregation has a weak positive effect on peak occurrence numbers at cell level. Pest  
231 density threshold exceedances occur homogeneously over large areas of contiguous crop, but these peaks  
232 are of relatively small magnitude because hotspots with high pest clusters and concentration do not build  
233 up. Predator spillover (*i.e.*, movement from hedge to field) results in a decrease of the number of threshold  
234 exceedances, but it may increase pest peak values since the predators are not homogeneously present in  
235 the patches and over the whole landscape. Predators have stronger influence near hedges (*e.g.*, in cells  
236 overlapping different patches) but less in the center of the patch (central cells).

## 237 5 Discussion

238 In this work we propose post-model scaling using regression meta-models based on marked STPPs. This  
239 approach enabled us to assess and compare the contribution of different spatio-temporal covariates and  
240 life-history traits to the direction and strength of variation in crucial events of population dynamics issued  
241 from spatially explicit models. The use of statistical regression meta-models makes our approach flexible  
242 and easy to implement, while numerous and diverse covariates describing local and global characteristics  
243 can be incorporated. We applied our methodology to the outputs of a SEM describing the biological control  
244 in agricultural landscapes of a crop pest by its natural predator. We found significantly different effects of  
245 landscape structures at various spatial scales on the population dynamics patterns.

246 The adaptation of our approach of defining a marked STPP meta-model may be relevant and insightful  
247 in various contexts. Examples are occurrence locations and times of earthquake epicentres (Lombardo et al.,  
248 2019), wildfires (Opitz et al., 2020), epidemiological outbreaks (White et al., 2018a), biodiversity hotspots  
249 and species distribution (Soriano-Redondo et al., 2019), pollutant concentrations (Lindström et al., 2014)  
250 or local maxima or minima in meteorological events (Heaton et al., 2011). In most ecological process  
251 space and time are closely intertwined and not separable as in our case, where pest introductions and  
252 subsequent peaks depend on local temporal dynamics driven by local spatial structure. Thus, here, we  
253 designed our approach to allow for joint analysis of spatial and temporal scales. For ecological processes  
254 related to those we study, White et al. (2018a) addressed how landscape structure impacts simulated disease  
255 dynamics in an individual-based susceptible–infected–recovered model. They quantified disease dynamics  
256 by outbreak maximum prevalence and duration, coupled with landscape heterogeneity defined by patchiness  
257 and proportion of available habitat. They find that fragmentation promotes pathogen persistence, except  
258 for simulation with high conspecific density, slower recovery rates and larger perceptual ranges, where more  
259 complex disease dynamics emerged; the most fragmented landscapes were not necessarily the most conducive  
260 to outbreaks or pathogen persistence. Our work has similar thrust by exploring the effect of landscape  
261 heterogeneity on pest density peaks. However, by taking advantage of the STPP modelling, we focus on  
262 spatio-temporal positions of peaks, and we investigate which factors locally influence occurrence intensity  
263 and magnitude of these events. The meta-model allowed us to depict complex spatial dynamics and patterns  
264 even if multiple processes occur at competing scales (White et al., 2018b). To assess fine-scale biodiversity,  
265 Azaele et al. (2015) captured species patterns through correlations among different species’ abundances  
266 across sample plots. Therefore, they used counts over spatial units (*i.e.*, plots), determined by the sampling  
267 design and leading to relatively large counts, and they contrasted their results with common species–area  
268 curves (Fritsch et al., 2020). They concluded that this mathematical framework provides a common language

269 to link different spatial scales. Our approach goes beyond a purely descriptive "geostatistical" analysis since  
270 we take into account the space-time position of each of the points as well as their relationships with nearby  
271 key elements. This representation parsimoniously summarises spatially continuous dynamics into discrete  
272 occurrences of spatio-temporal key events and allows modeling them for explanatory and predictive purposes.  
273 Our regression model for occurrence intensities also aggregates individual events, but we work with relatively  
274 small counts by choosing appropriate, problem-specific space-time units.

275 Ecosystem patterns and processes can cover a wide range of space and time, and they depend on multiple  
276 drivers acting over different scales (Fritsch et al., 2020). Problematic loss and the lack of information may  
277 arise in procedures of scaling-up or scaling-down when coupled with the complexity of the involved systems.  
278 Our work strikes a pragmatic balance with respect to the inevitable trade-off between model simplicity, to  
279 obtain clear insights into important factors, and model complexity, to achieve a more complete and realistic  
280 representation of the system (Lacy et al., 2013). Spatio-temporal meta-models present a flexible solution  
281 by capturing the functional linkages between model components. They show potential to reveal properties  
282 in ecological systems that are difficult to identify when considering only the complex model output with  
283 large data volumes as a whole (Lacy et al., 2013). Our STPP model allowed for a relatively complex spatio-  
284 temporal local analysis of system dynamics. It therefore provides insights into the role of different effects  
285 and takes process-specific scales into account by using categorical or numerical marks. Through statistical  
286 inferences it becomes possible to identify significant relationships of key events with their drivers focusing on  
287 biotic interactions, habitat heterogeneity and spatio-temporal stochastic effects predictions (Baddeley et al.,  
288 2015).

289 A large body of literature on meta-models (or surrogate models, or emulators) in various disciplines  
290 focuses on Gaussian processes or machine-learning techniques (*e.g.*, Forrester et al., 2008; Kleijnen, 2015),  
291 whereas our work highlights the potential of point-process-based approaches for dynamical systems. This  
292 novel way of conducting meta-analyses is applicable to various collections of relevant events arising in dy-  
293 namical processes available at high spatio-temporal resolution. We emphasise that our methods leverage  
294 spatio-temporal and multivariate point pattern techniques, while the state-of-the-art in point pattern anal-  
295 yses deals mostly with purely spatial patterns or does not well represent the temporal dimension (Wiegand  
296 et al., 2017). Our extensions are well-suited for spatio-temporal mechanisms and population dynamic pa-  
297 rameters where the assessment of their relative and joint role is crucial for characterising emerging diversity  
298 patterns.

299 We have constructed a collection of predictor variables in which spatio-temporal covariates (STC) con-  
300 tribute spatio-temporally structured information, such as the number or magnitudes of previous or concomi-  
301 tant events around a given location and time, to convey information related to the local evolution of pest



302 dynamics. In a similar context, Le Gal et al. (2020) highlighted the important influence of the interplay  
303 between the landscape structure and the timing of CBC measures on the delivery of pest control services.  
304 They showed that increased semi-natural habitat proportion at the landscape level enhances the visitation  
305 rate of pest-colonised crop cells, but it also reduces the delay between pest colonisation and predator arrival  
306 in the crop fields. In our model, we have opted for simulating the time and position of pest arrival according  
307 to a Poisson process with intensity proportional to crop area. We found that locations showing frequent and  
308 high density peaks in previous time steps are likely to incur new peaks. On the other hand, local previous  
309 treatments in a patch negatively influence the dynamics since they efficiently reduce the pest density in this  
310 patch. Introductions of pest act as an accelerator of local pest dynamics, and after a short period we often  
311 assist to both high frequency and high magnitudes of peaks in the surrounding fields.

312 Spatial covariates (SC) in our regression meta-models are time-invariant landscape characteristics that  
313 may influence pest peaks. Crop proportion is the main driver for pest in our models, and leads to a clear  
314 positive response of pest insects to increasing cover of a suitable crop (Ricci et al., 2019; Rand et al., 2014;  
315 Zhao et al., 2015; Avelino et al., 2012; Tschardt et al., 2007). Our results show that considering it at local  
316 scale or at global scale leads to different peak patterns. When crop aggregation and percentage coverage are  
317 high in the whole landscape, exceedance events of pest density are relatively homogeneously spread over the  
318 area with generally relatively low pest density values throughout. Instead, when high crop coverage is only  
319 local (*i.e.*, in the buffer), the resulting pattern shows a locally higher number of exceedance events with high  
320 peaks; pests find their preferred habitat in a more limited space and tend to concentrate there. Zamberletti  
321 et al. (2021) showed that in landscapes with strong aggregation of crop fields the area of contiguous crop may  
322 cause a dilution effect, with a positive effect on pest population, a negative effect on treatment occurrence,  
323 and a positive effect on the treatment numbers in the whole landscape. Therefore, if treatments are necessary  
324 in a patch, they tend to arise in relatively high numbers over the full observation period. Hedge distribution  
325 and proportion can be viewed as a proxy for predator presence and reveal when predators may play a role in  
326 reducing pest density (Bianchi et al., 2006; Tschardt et al., 2007). The effects attributed to semi-natural  
327 habitat (*e.g.*, hedges) are ambiguous with both positive, negative or neutral impacts on CBC (Chaplin-  
328 Kramer et al., 2011; Karp et al., 2018). In our models, total hedge proportion has a small but positive effect  
329 on both the number and the magnitude of peaks. A reason could be that the global proportion of hedges  
330 does not inform about hedge connectivity and distribution (*e.g.*, homogeneously or in clusters). If there  
331 is a high hedge coverage, predators are expected to be homogeneously distributed in the landscape, thus  
332 stabilising the pest population and potentially reaching an equilibrium in the whole landscape for pest and  
333 predator density. However, this does not imply that pest density remains under the treatment threshold; it  
334 could happen that other parameters influence its dynamics by favouring pest population (*e.g.*, crop coverage

335 or pest growth rate) or decreasing predator presence in field (*e.g.*, mortality, spillover from hedge). This  
336 results in a homogeneous predator presence that is not sufficient to prevent pest density from exceeding  
337 the threshold. In our model, another reason could stem from statistical confusion in the regression models  
338 between the effects of global hedge proportion and global crop proportion since the simulated landscape  
339 model tends to position hedges more often in crop areas than in the rest of the landscape. However, when  
340 focusing on local buffers around a cell, local hedge structure, and the resulting predator concentration, play  
341 a bigger role by reducing both number of pest peaks and their magnitude.

342 Population dynamics covariates (PDC) in our models are related to species traits. Here we consider the  
343 effect of varying population parameters related to species mobility in the environment. We focus on how the  
344 structure of landscape elements influences species spread with respect to the studied events. We find that  
345 predator diffusion ability over the landscape is fundamental to reduce the presence of pest. Interestingly,  
346 we do not notice the same effect for predator migration speed from hedge to field. This predator trait acts  
347 strongly at locations close to hedges, *i.e.*, around patch borders, with a strong decrease in the number of  
348 peaks, while the peak value is not affected but is high mainly in the patch core areas.

349 In the agro-ecological context, our analysis aids prediction and management decisions. For example,  
350 improved understanding of local spatio-temporal relationships and dynamics helps to schedule specific local  
351 control strategies by targeting the locations that frequently suffer from pest peaks and the moments when  
352 local control strategies can be expected to be most efficient to control pest dynamics.

## 353 References

- 354 Avelino, J., Romero-Gurdián, A., Cruz-Cuellar, H. F., and Declerck, F. A. (2012). Landscape context and  
355 scale differentially impact coffee leaf rust, coffee berry borer, and coffee root-knot nematodes. Ecological  
356 applications, 22(2):584–596.
- 357 Azaele, S., Maritan, A., Cornell, S. J., Suweis, S., Banavar, J. R., Gabriel, D., and Kunin, W. E. (2015).  
358 Towards a unified descriptive theory for spatial ecology: predicting biodiversity patterns across spatial  
359 scales. Methods in Ecology and Evolution, 6(3):324–332.
- 360 Baddeley, A., Rubak, E., and Turner, R. (2015). Spatial point patterns: methodology and applications with  
361 R. CRC press.
- 362 Bianchi, F. J., Booij, C., and Tschardtke, T. (2006). Sustainable pest regulation in agricultural landscapes:  
363 a review on landscape composition, biodiversity and natural pest control. Proceedings of the Royal Society  
364 B: Biological Sciences, 273(1595):1715–1727.

- 365 Chaplin-Kramer, R., O'Rourke, M. E., Blitzer, E. J., and Kremen, C. (2011). A meta-analysis of crop pest  
366 and natural enemy response to landscape complexity. Ecology letters, 14(9):922–932.
- 367 DeAngelis, D. L. and Yurek, S. (2017). Spatially explicit modeling in ecology: a review. Ecosystems,  
368 20(2):284–300.
- 369 Delaune, T., Ballot, R., Gouwie, C., Maupas, F., Sausse, C., Félix, I., Brun, F., and Barbu, C. (2019).  
370 Spatiotemporal drivers of crop pests and pathogens abundance at the landscape scale. bioRxiv, page  
371 641555.
- 372 Diggle, P. (2003). Statistical Analysis of Spatial Point Patterns, 2nd edn Arnold. Hodder Education, London,  
373 UK.
- 374 Eber, S. (2001). Multitrophic interactions: the population dynamics of spatially structured plant-herbivore-  
375 parasitoid systems. Basic and Applied Ecology, 2(1):27–33.
- 376 Fahrig, L. (2001). How much habitat is enough? Biological conservation, 100(1):65–74.
- 377 Forrester, A., Sobester, A., and Keane, A. (2008). Engineering design via surrogate modelling: a practical  
378 guide. John Wiley & Sons.
- 379 Franck, P., Ricci, B., Klein, E. K., Olivares, J., Simon, S., Cornuet, J.-M., and Lavigne, C. (2011). Genetic  
380 inferences about the population dynamics of codling moth females at a local scale. Genetica, 139(7):949.
- 381 Fritsch, M., Lischke, H., and Meyer, K. M. (2020). Scaling methods in ecological modelling. Methods in  
382 Ecology and Evolution, 11(11):1368–1378.
- 383 Gabriel, E., Opitz, T., and Bonneu, F. (2017). Detecting and modeling multi-scale space-time structures:  
384 the case of wildfire occurrences. Journal de la Société Française de Statistique, 158(3):86–105.
- 385 Gotelli, N. J. (2000). Null model analysis of species co-occurrence patterns. Ecology, 81(9):2606–2621.
- 386 Grimm, V. and Railsback, S. F. (2005). Individual-based modeling and ecology, volume 8. Princeton  
387 university press.
- 388 Grimm, V., Revilla, E., Berger, U., Jeltsch, F., Mooij, W. M., Railsback, S. F., Thulke, H.-H., Weiner, J.,  
389 Wiegand, T., and DeAngelis, D. L. (2005). Pattern-oriented modeling of agent-based complex systems:  
390 lessons from ecology. science, 310(5750):987–991.
- 391 Hanski, I. and Thomas, C. D. (1994). Metapopulation dynamics and conservation: a spatially explicit model  
392 applied to butterflies. Biological Conservation, 68(2):167–180.

- 393 Heaton, M. J., Katzfuss, M., Ramachandar, S., Pedings, K., Gilleland, E., Mannshardt-Shamseldin, E., and  
394 Smith, R. L. (2011). Spatio-temporal models for large-scale indicators of extreme weather. Environmetrics,  
395 22(3):294–303.
- 396 Hogeweg, P. (1988). Cellular automata as a paradigm for ecological modeling. Applied mathematics and  
397 computation, 27(1):81–100.
- 398 Illian, J., Penttinen, A., Stoyan, D., and Stoyan, H. (2008). Analysis and Modelling of Spatial Point Patterns,  
399 from Spatial Data to Knowledge. Wiley, Chichester, UK.
- 400 Illian, J. B. and Burslem, D. F. (2017). Improving the usability of spatial point process methodology: an in-  
401 terdisciplinary dialogue between statistics and ecology. AStA Advances in Statistical Analysis, 101(4):495–  
402 520.
- 403 Illian, J. B., Martino, S., Sørbye, S. H., Gallego-Fernández, J. B., Zunzunegui, M., Esquivias, M. P., and  
404 Travis, J. M. (2013). Fitting complex ecological point process models with integrated nested laplace  
405 approximation. Methods in Ecology and Evolution, 4(4):305–315.
- 406 Illian, J. B., Sørbye, S. H., Rue, H., and Hendrichsen, D. K. (2012). Using inla to fit a complex point process  
407 model with temporally varying effects—a case study. Journal of Environmental Statistics, 3(7).
- 408 Jia, G. and Taflanidis, A. A. (2013). Kriging metamodeling for approximation of high-dimensional wave and  
409 surge responses in real-time storm/hurricane risk assessment. Computer Methods in Applied Mechanics  
410 and Engineering, 261:24–38.
- 411 Johst, K., Lima, M., and Berryman, A. A. (2013). Scaling up: how do exogenous fluctuations in individual-  
412 based resource competition models re-emerge in aggregated stochastic population models? Population  
413 ecology, 55(1):173–182.
- 414 Kang, J., Nichols, T. E., Wager, T. D., and Johnson, T. D. (2014). A bayesian hierarchical spatial point  
415 process model for multi-type neuroimaging meta-analysis. The annals of applied statistics, 8(3):1800.
- 416 Karp, D. S., Chaplin-Kramer, R., Meehan, T. D., Martin, E. A., DeClerck, F., Grab, H., Gratton, C.,  
417 Hunt, L., Larsen, A. E., Martínez-Salinas, A., et al. (2018). Crop pests and predators exhibit inconsis-  
418 tent responses to surrounding landscape composition. Proceedings of the National Academy of Sciences,  
419 115(33):E7863–E7870.
- 420 Kleijnen, J. P. (2015). Design and analysis of simulation experiments. In International Workshop on  
421 Simulation, pages 3–22. Springer.

- 422 Lacy, R. C., Miller, P. S., Nyhus, P. J., Pollak, J., Raboy, B. E., and Zeigler, S. L. (2013). Metamodels for  
423 transdisciplinary analysis of wildlife population dynamics. PLoS One, 8(12):e84211.
- 424 Law, R., Illian, J., Burslem, D. F., Gratzner, G., Gunatilleke, C., and Gunatilleke, I. (2009). Ecological  
425 information from spatial patterns of plants: insights from point process theory. Journal of Ecology,  
426 97(4):616–628.
- 427 Le Gal, A., Robert, C., Accatino, F., Claessen, D., and Lecomte, J. (2020). Modelling the interactions  
428 between landscape structure and spatio-temporal dynamics of pest natural enemies: Implications for  
429 conservation biological control. Ecological Modelling, 420:108912.
- 430 Lefebvre, M., Papaix, J., Mollot, G., Deschodt, P., Lavigne, C., Ricard, J.-M., Mandrin, J.-F., and Franck, P.  
431 (2017). Bayesian inferences of arthropod movements between hedgerows and orchards. Basic and Applied  
432 Ecology, 21:76–84.
- 433 Levin, S. A. (1992). The problem of pattern and scale in ecology: the robert h. macarthur award lecture.  
434 Ecology, 73(6):1943–1967.
- 435 Lindström, J., Szpiro, A. A., Sampson, P. D., Oron, A. P., Richards, M., Larson, T. V., and Sheppard, L.  
436 (2014). A flexible spatio-temporal model for air pollution with spatial and spatio-temporal covariates.  
437 Environmental and ecological statistics, 21(3):411–433.
- 438 Lombardo, L., Opitz, T., and Huser, R. (2019). Numerical recipes for landslide spatial prediction using  
439 r-inla: a step-by-step tutorial. In Spatial modeling in GIS and R for earth and environmental sciences,  
440 pages 55–83. Elsevier.
- 441 Maalouly, M., Franck, P., Bouvier, J.-C., Toubon, J.-F., and Lavigne, C. (2013). Codling moth parasitism is  
442 affected by semi-natural habitats and agricultural practices at orchard and landscape levels. Agriculture,  
443 ecosystems & environment, 169:33–42.
- 444 Nathan, L. R., Mamoozadeh, N., Tumas, H. R., Gungelman, S., Klass, K., Metcalfe, A., Edge, C., Waits,  
445 L. P., Spruell, P., Lowery, E., et al. (2019). A spatially-explicit, individual-based demogenetic simulation  
446 framework for evaluating hybridization dynamics. Ecological Modelling, 401:40–51.
- 447 Opitz, T., Bonneu, F., and Gabriel, E. (2020). Point-process based Bayesian modeling of space–time struc-  
448 tures of forest fire occurrences in Mediterranean France. Spatial Statistics, page 100429.
- 449 O’Rourke, M. E., Rienzo-Stack, K., and Power, A. G. (2011). A multi-scale, landscape approach to predicting  
450 insect populations in agroecosystems. Ecological Applications, 21(5):1782–1791.

- 451 Pickett, S. R. and Siriwardena, G. M. (2011). The relationship between multi-scale habitat heterogeneity  
452 and farmland bird abundance. Ecography, 34(6):955–969.
- 453 Pimont, F., Fargeon, H., Opitz, T., Ruffault, J., Barbero, R., Martin-StPaul, N., Rigolot, E., Riviere, M.,  
454 and Dupuy, J.-L. (2020). Prediction of regional wildfire activity with a probabilistic Bayesian framework.  
455 Ecological Applications (accepted).
- 456 Rand, T. A., Waters, D. K., Blodgett, S. L., Knodel, J. J., and Harris, M. O. (2014). Increased area of a  
457 highly suitable host crop increases herbivore pressure in intensified agricultural landscapes. Agriculture,  
458 Ecosystems & Environment, 186:135–143.
- 459 Ratto, M., Castelletti, A., and Pagano, A. (2012). Emulation techniques for the reduction and sensitivity  
460 analysis of complex environmental models. Environmental Modelling and Software, 34:1–4.
- 461 Renshaw, E. (2015). Stochastic population processes: analysis, approximations, simulations. OUP Oxford.
- 462 Ricci, B., Franck, P., Toubon, J.-F., Bouvier, J.-C., Sauphanor, B., and Lavigne, C. (2009). The influence of  
463 landscape on insect pest dynamics: a case study in southeastern france. Landscape ecology, 24(3):337–349.
- 464 Ricci, B., Lavigne, C., Alignier, A., Aviron, S., Biju-Duval, L., Bouvier, J., Choisis, J.-P., Franck, P.,  
465 Joannon, A., Ladet, S., et al. (2019). Local pesticide use intensity conditions landscape effects on biological  
466 pest control. Proceedings of the Royal Society B, 286(1904):20182898.
- 467 Roques, L. (2013). Modèles de réaction-diffusion pour l’écologie spatiale. Editions Quae.
- 468 Roques, L. and Bonnefon, O. (2016). Modelling population dynamics in realistic landscapes with linear  
469 elements: a mechanistic-statistical reaction-diffusion approach. PloS one, 11(3).
- 470 Rusch, A., Valantin-Morison, M., Sarthou, J.-P., and Roger-Estrade, J. (2010). Biological control of insect  
471 pests in agroecosystems: effects of crop management, farming systems, and seminatural habitats at the  
472 landscape scale: a review. In Advances in agronomy, volume 109, pages 219–259. Elsevier.
- 473 Saint-Geours, N. (2012). Sensitivity analysis of spatial models: application to cost-benefit analysis of flood  
474 risk management plans. PhD thesis.
- 475 Simpson, T. W., Poplinski, J., Koch, P. N., and Allen, J. K. (2001). Metamodels for computer-based  
476 engineering design: survey and recommendations. Engineering with computers, 17(2):129–150.
- 477 Soriano-Redondo, A., Jones-Todd, C. M., Bearhop, S., Hilton, G. M., Lock, L., Stanbury, A., Votier, S. C.,  
478 and Illian, J. B. (2019). Understanding species distribution in dynamic populations: A new approach  
479 using spatio-temporal point process models. Ecography, 42(6):1092–1102.

- 480 Thies, C. and Tscharntke, T. (1999). Landscape structure and biological control in agroecosystems. Science,  
481 285(5429):893–895.
- 482 Tischendorf, L. (2001). Can landscape indices predict ecological processes consistently? Landscape ecology,  
483 16(3):235–254.
- 484 Tscharntke, T., Bommarco, R., Clough, Y., Crist, T., Kleijn, D., Rand, T., Tylianakis, J., Van Nouhuys, S.,  
485 and Vidal, S. (2007). Conservation biological control and enemy diversity on a landscape scale [erratum:  
486 2008 may, v. 45, issue 2, p. 238-253.]. Biological control: theory and application in pest management.
- 487 Tscharntke, T. and Brandl, R. (2004). Plant-insect interactions in fragmented landscapes. Annual Reviews  
488 in Entomology, 49(1):405–430.
- 489 Webb, C. O. (2000). Exploring the phylogenetic structure of ecological communities: an example for rain  
490 forest trees. The American Naturalist, 156(2):145–155.
- 491 White, L. A., Forester, J. D., and Craft, M. E. (2018a). Disease outbreak thresholds emerge from interactions  
492 between movement behavior, landscape structure, and epidemiology. Proceedings of the National Academy  
493 of Sciences, 115(28):7374–7379.
- 494 White, L. A., Forester, J. D., and Craft, M. E. (2018b). Dynamic, spatial models of parasite transmission in  
495 wildlife: Their structure, applications and remaining challenges. Journal of Animal Ecology, 87(3):559–  
496 580.
- 497 Wiegand, T., Uriarte, M., Kraft, N. J., Shen, G., Wang, X., and He, F. (2017). Spatially explicit metrics of  
498 species diversity, functional diversity, and phylogenetic diversity: Insights into plant community assembly  
499 processes. Annual Review of Ecology, Evolution, and Systematics, 48:329–351.
- 500 Zamberletti, P., Sabir, K., Opitz, T., Bonnefon, O., Gabriel, E., and Papaix, J. (2021). More pests but  
501 less treatments: ambivalent effect of landscape complexity on conservation biological control. bioRxiv,  
502 10.1101/2021.03.19.436155.
- 503 Zhao, Z.-H., Hui, C., He, D.-H., and Li, B.-L. (2015). Effects of agricultural intensification on ability of  
504 natural enemies to control aphids. Scientific reports, 5:8024.
